# Supplementary material for: Group size effect on cooperation in one-shot social dilemmas
Source: PubMed Central journal article supplement (PMC4300455; doi:10.1038/srep07937), 2015-01-21
Supplement: srep07937-s1.pdf [file srep07937-s1.pdf]

# Supplementary Information for ‘Group size effect on cooperation in one-shot social dilemmas’

H  l  ne Barcelo<sup>1</sup> & Valerio Capraro<sup>2</sup>

<sup>1</sup>Mathematical Sciences Research Institute, CA 94720, Berkeley, USA

<sup>2</sup>Center for Mathematics and Computer Science (CWI), 1098 XG, Amsterdam, The Netherlands.

In this Supplementary Information we collect the proofs of all the results we stated in the Theoretical Results section.

*Proof of Proposition 1.* Fix, for notational simplicity,  $i = 1$ . We have  $U_1(C, \dots, C) = b - c$  and

$$\begin{aligned} U_1(D, C, \dots, C) &= b - \beta_1 \left( b - b \frac{N-2}{N-1} + c \right) \\ &= b - \frac{b\beta_1}{(N-1)} - \frac{c\beta_1}{N-1}. \end{aligned}$$

It is clear that if  $N$  is large enough (depending on the player and on  $b$  and  $c$ ), one has  $U_1(D, C, \dots, C) > U_1(C, \dots, C)$ .  $\square$

*Proof of Proposition 2.* Fix player  $i = 1$ . We have  $U_1(1, \dots, 1) = \gamma N$  and

$$\begin{aligned} U_1(0, 1, \dots, 1) &= \gamma(N-1) + 1 - \beta_1 (\gamma(N-1) + 1 - \gamma(N-1)) \\ &= \gamma(N-1) + 1 - \beta_1. \end{aligned}$$

It is clear then clear that the condition  $U_1(0, 1, \dots, 1) > U_1(1, \dots, 1)$  is independent of  $N$ .  $\square$

*Proof of Proposition 3.* Fix  $i = 1$ . We have  $U_1(C, \dots, C) = \alpha_1(b - c) + (1 - \alpha_1)(b - c)(N - 1)$  and

$$\begin{aligned} U_1(D, C, \dots, C) &= \alpha_1 b + (1 - \alpha_1)b + (1 - \alpha_1)(N - 1) \left( \frac{b(N-2)}{N-1} - c \right) \\ &= b + (1 - \alpha_1)(bN - 2b - cN + c). \end{aligned}$$

Observe that the condition  $U_1(D, C, \dots, C) > U_1(C, \dots, C)$  reduces to  $\alpha > 1 - \frac{c}{b}$  and so it does not depend on  $N$ .  $\square$

*Proof of Proposition 4.* We have  $U_1(1, \dots, 1) = \alpha_1 \gamma N + \gamma N^2 - \alpha_1 \gamma N^2$  and

$$\begin{aligned} U_1(0, 1, \dots, 1) &= \alpha_1(1 + \gamma(N - 1)) + (1 - \alpha_1)(1 + \gamma(N - 1)) + \gamma(1 - \alpha_1)(N - 1)^2 \\ &= 1 - \gamma N + \gamma N^2 + 2\alpha_1 \gamma N - \alpha_1 \gamma N^2 - \alpha_1 \gamma. \end{aligned}$$

It is then clear that the condition  $U_1(0, 1, \dots, 1) < U_1(1, \dots, 1)$  reduces to

$$1 - \alpha_1 \gamma + \gamma N(\alpha_1 - 1) < 0,$$

which is always verified if  $N$  is large enough.  $\square$

*Proof of Theorem 1.* Since  $\mathcal{G}_{p_s} = \mathcal{G}$ , then  $\sigma^{p_s}$  is the Nash equilibrium of the original game. Since there is no incentive to deviate from a Nash equilibrium, the  $\tau$  measure is the Dirac measure concentrated on  $J = \emptyset$ . Therefore  $v_i(p_s)$  coincides with the payoff in equilibrium; that is,  $v_i(p_s) = 1$ .

Let now  $p_c$  be the fully cooperative coalition structure and observe that, for all  $j \in P$ , one has  $I_j(p_c) = 1 - \gamma$  and  $D_j(p_c) = \gamma N - 1$ . Consequently,  $\tau_{i,j}(p_c) = \frac{1-\gamma}{\gamma(N-1)}$ , for all  $i, j \in P, i \neq j$ . Now,  $e_{i,J}(p_c) = \gamma$ , for all  $J \neq \emptyset$ , and  $e_{i,\emptyset}(p_c) = \gamma N$ . Therefore,

$$\begin{aligned} v_i(p_c) &= \gamma N \left(1 - \frac{1-\gamma}{\gamma(N-1)}\right)^{N-1} + \gamma \left(1 - \left(1 - \frac{1-\gamma}{\gamma(N-1)}\right)^{N-1}\right) \\ &= \gamma N \left(\frac{\gamma N - 1}{\gamma(N-1)}\right)^{N-1} + \gamma \left(1 - \left(\frac{\gamma N - 1}{\gamma(N-1)}\right)^{N-1}\right). \end{aligned}$$

To compute the cooperative equilibrium, we observe that this would be the lowest contribution among the ones which, if contributed by all players, would give to all players a payoff of at least  $v_i(p_c)$ . To compute this contribution it is enough to solve the equation

$$1 - \lambda + \gamma N \lambda = v_i(p_c),$$

whose solution is indeed  $\lambda = \frac{v_i(p_c) - 1}{\gamma N - 1}$ , as stated.

It remains to show that the cooperative equilibrium is increasing with  $N$ . To this end, we replace  $N$  by a continuous variable  $x \geq 2$  and denote  $v(x) := v_i(p_c)$ ,  $f(x) = \frac{v(x) - 1}{\gamma x - 1}$ , and  $r(x) = \left(\frac{\gamma x - 1}{\gamma(x-1)}\right)^{x-1}$ . Observe that all these functions are differentiable in our domain of interest  $x \geq 2$ . Our aim is to show that  $f(x)$  is increasing, that is,  $f'(x) > 0$ . We start by observing that  $r(x)$  is increasing. This can be seen essentially in the same way as one sees the standard fact that  $(1 + \frac{1}{n})^n$  is increasing in  $n$ , by using Bernoulli's inequality. Hence, we have

$$v'(x) = \gamma r(x) + \gamma r'(x)(x - 1) > \gamma r(x).$$

Consequently, using also the fact that  $\gamma xr(x) = v(x) - \gamma(1 - r(x))$ , we conclude

$$\begin{aligned} f'(x) &= \frac{v'(x)(\gamma x - 1) - \gamma(v(x) - 1)}{(\gamma x - 1)^2} \\ &> \frac{\gamma(\gamma xr(x) - v(x) + 1)}{(\gamma x - 1)^2} \\ &= \frac{\gamma(1 - \gamma(1 - r(x)))}{(\gamma x - 1)^2} \\ &> 0, \end{aligned}$$

where, the last inequality follows from the fact that both  $\gamma$  and  $r(x)$  are strictly smaller than 1.  $\square$

*Proof.* The forecast associated to the selfish coalition structure is  $v_i(p_s) = 0$ , for all players, corresponding to the payoff in (Nash) equilibrium. To compute the forecast associated to the fully cooperative coalition structure, observe that  $e_{i,\emptyset}(p_c) = b - c$ , corresponding to Pareto optimum where all players cooperate. The incentive to deviate from the cooperative strategy is  $I_j(p_c) = c$ , while the disincentive is  $D_j(p_c) = b - c$ , corresponding to the loss incurred in case all other players anticipate player  $j$ 's defection and decide to defect as well. Finally,  $e_{i,J}(p_c) = -c$ , for all  $J \neq \emptyset$ , corresponding to the strategy profile where only player  $i$  cooperates and all other players defect. Hence we have

$$v_i(p_c) = (b - c) \left(1 - \frac{c}{b}\right)^{N-1} - c \left(1 - \left(1 - \frac{c}{b}\right)^{N-1}\right).$$

Of course, if  $v_i(p_c) \leq 0$ , then the cooperative equilibrium coincides with the Nash equilibrium. Otherwise, by symmetry, it is the only strategy  $\sigma$  such that

$$u_i(\sigma, \dots, \sigma) = v_i(p_c), \quad (1)$$

for all  $i \in P$ . Setting  $\sigma = \lambda C + (1 - \lambda)D$ , we obtain

$$\begin{aligned} u_i(\sigma, \dots, \sigma) &= \lambda \sum_{k=0}^{N-1} \lambda^{N-1-k} (1 - \lambda)^k \binom{N-1}{k} \left( \frac{b(N-1-k)}{N-1} - c \right) \\ &\quad + (1 - \lambda) \sum_{k=0}^{N-1} \lambda^{N-1-k} (1 - \lambda)^k \binom{N-1}{k} \left( \frac{b(N-1-k)}{N-1} \right) \\ &= \sum_{k=0}^{N-1} \lambda^{N-1-k} (1 - \lambda)^k \binom{N-1}{k} \frac{b(N-1-k)}{N-1} - c\lambda \\ &= b - c\lambda - \frac{b}{N-1} \sum_{k=0}^{N-1} \lambda^{N-1-k} (1 - \lambda)^k \binom{N-1}{k} k. \end{aligned}$$

Now we use the fact that

$$\sum_{k=0}^{N-1} \lambda^{N-1-k} (1-\lambda)^k \binom{N-1}{k} k = (1-\lambda)(N-1),$$

to reduce Equation (1) to

$$\lambda(b-c) = v_i(p_c), \tag{2}$$

which concludes the proof.  $\square$
